# Supplementary material
Source: PubMed Central journal article supplement (PMC4766373)
Supplement: NIHMS759925-supplement-SM.pdf [file NIHMS759925-supplement-SM.pdf]

Supplementary Materials for  
**Shedding of the tumor necrosis factor (TNF) receptor from the surface  
of hepatocytes during sepsis limits inflammation through cGMP  
signaling**

Meihong Deng, Patricia A. Loughran, Liyong Zhang, Melanie J. Scott,  
Timothy R. Billiar\*

\*Corresponding author. E-mail: billiartr@upmc.edu

Published 27 January 2015, *Sci. Signal.* **8**, ra11 (2015)  
DOI: 10.1126/scisignal.2005548

**The PDF file includes:**

- Fig. S1. The kinetics of TNFR1 and TNF release after CLP.
- Fig. S2. Analysis of plasma IL-1 $\beta$  concentrations at 8 hours after CLP.
- Fig. S3. The responses to LPS of hepatocytes from Alb-Cre mice are similar to those of hepatocytes from wild-type mice.
- Fig. S4. The responses to LPS of cells from Lyz-Cre mice are similar to those of cells from wild-type mice.

## Supplemental Figure 1

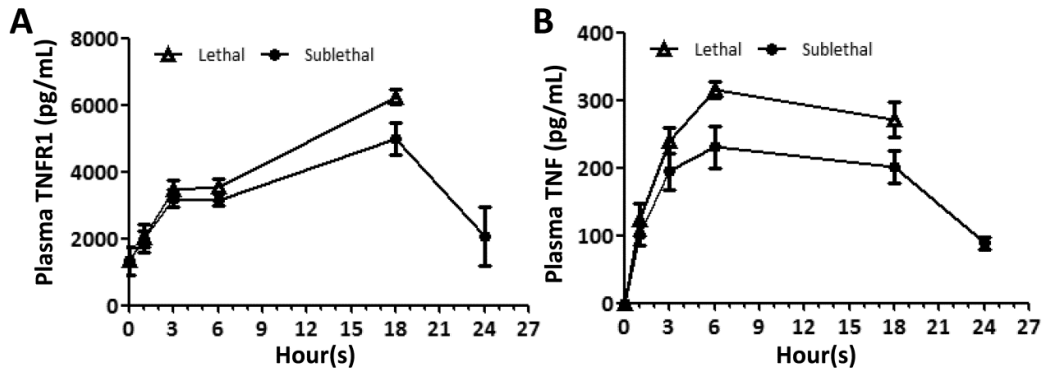

**Fig. S1. The kinetics of TNFR1 and TNF release after CLP.** (A and B) Mice were subjected to sublethal or lethal CLP and then were sacrificed at the indicated times. Mice at the zero hour time point represent unmanipulated controls. The plasma concentrations of (A) TNFR1 and (B) TNF at the indicated times were determined by ELISA. Data are means  $\pm$  SD from six mice per group.

## Supplemental Figure 2

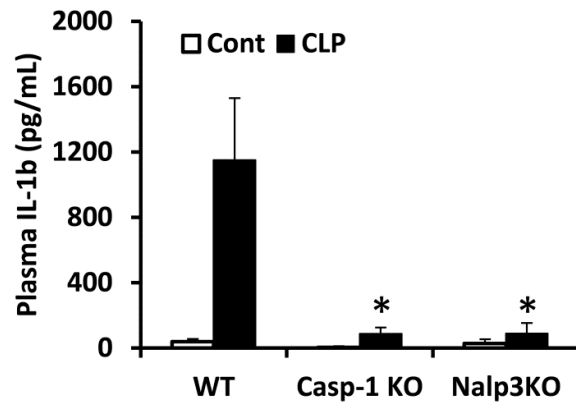

**Fig. S2. Analysis of plasma IL-1 $\beta$  concentrations at 8 hours after CLP.** Mice of the indicated genotypes were subjected to CLP. Eight hours later, plasma concentrations of IL-1 $\beta$  were determined by ELISA. Data are means  $\pm$  SD from six mice of each genotype. \* $P < 0.05$ , by one-way ANOVA.

### Supplemental Figure 3

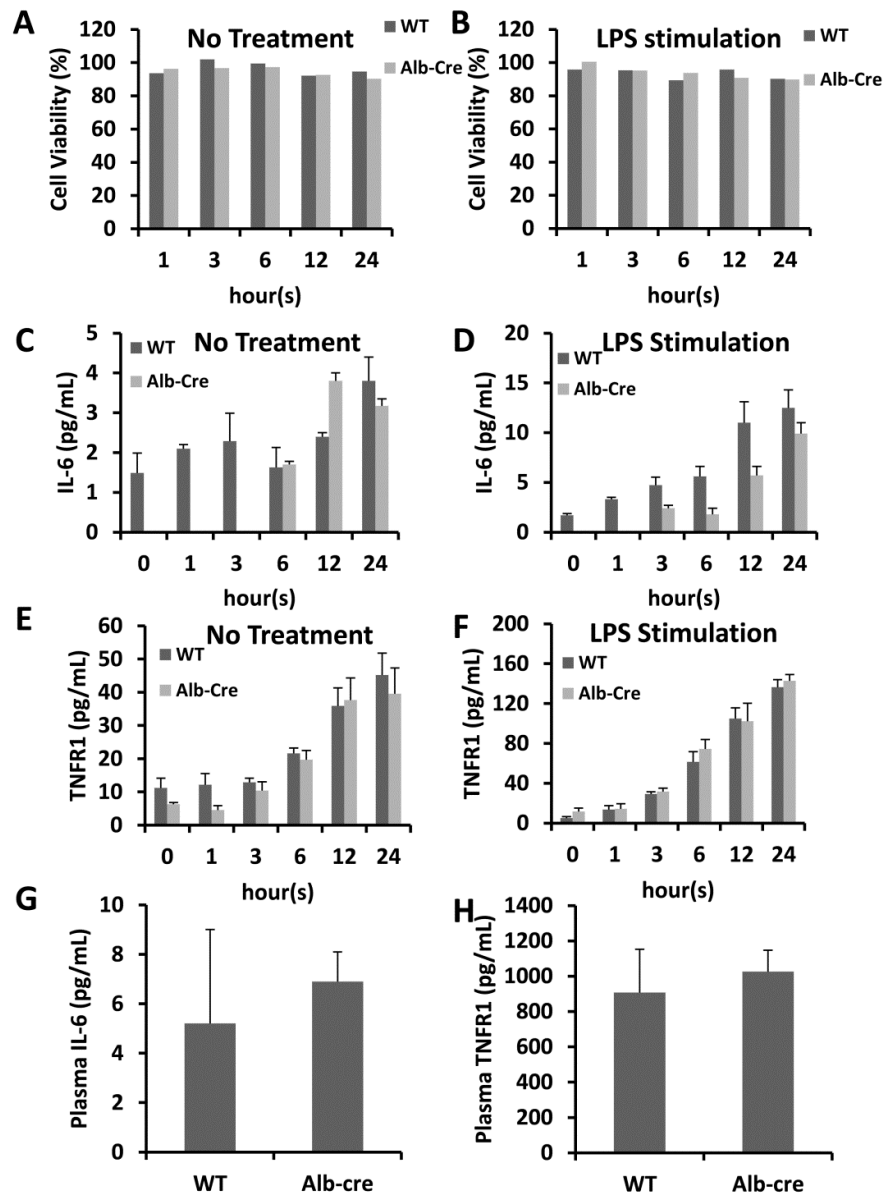

**Fig. S3. The responses to LPS of hepatocytes from Alb-Cre mice are similar to those of hepatocytes from wild-type mice.** (A to F) Hepatocytes isolated from wild-type (WT) or Alb-Cre mice were left untreated (zero hour time point) or were cultured in the absence (No Treatment) or presence of LPS (100 ng/ml) for the indicated times. (A and B) Cell viability was assessed by crystal violet staining. The concentrations of (C and D) IL-6 and (E and F) TNFR1 in the culture medium were measured by ELISA. Data in (A) to (F) are means  $\pm$  SD from two experiments. (G and H) Plasma samples isolated from unmanipulated WT and Alb-Cre mice were analyzed by ELISA to determine the concentrations of (G) IL-6 and (H) TNFR1. Data are means  $\pm$  SD from three (for WT) or two (for Alb-Cre) mice.

### Supplemental Figure 4

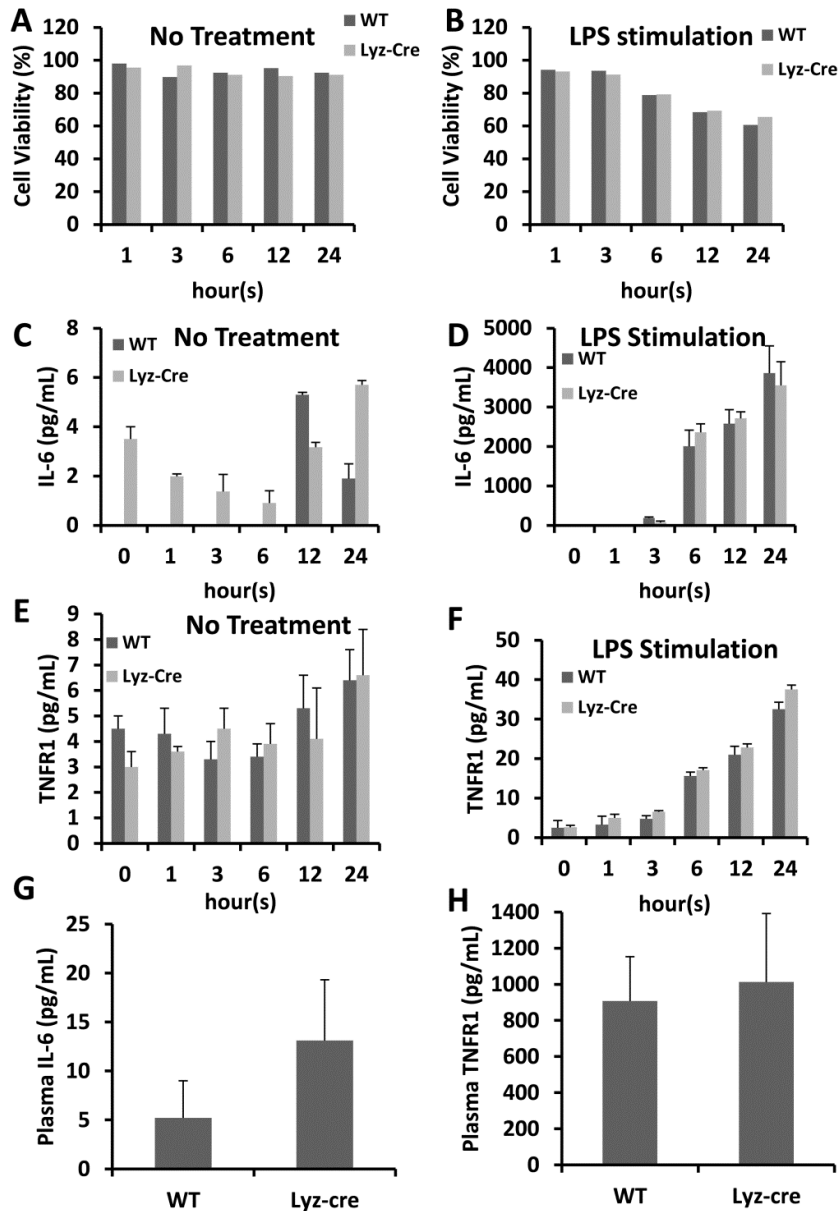

**Fig. S4. The responses to LPS of cells from Lyz-Cre mice are similar to those of cells from wild-type mice.** (A to F) Peritoneal macrophages isolated from WT and Lyz-Cre mice were left untreated (zero hour time point) or were cultured in the absence (No Treatment) or presence of LPS (100 ng/ml) for the indicated times. (A and B) Cell viability was assessed by crystal violet staining. The concentrations of (C and D) IL-6 and (E and F) TNFR1 in the culture medium were measured by ELISA. Data are means  $\pm$  SD from three experiments. (G and H) Plasma samples were isolated from unmanipulated WT and Lyz-Cre mice were analyzed by ELISA to determine the concentrations of (G) IL-6 and (H) TNFR1. Data are means  $\pm$  SD from three mice of each genotype.
